# Supplementary material
Source: PubMed Central journal article supplement (PMC2727981)
Supplement: NIHMS133214-supplement-Supp_Fig_1.pdf [file NIHMS133214-supplement-Supp_Fig_1.pdf]

## A) Experimental System

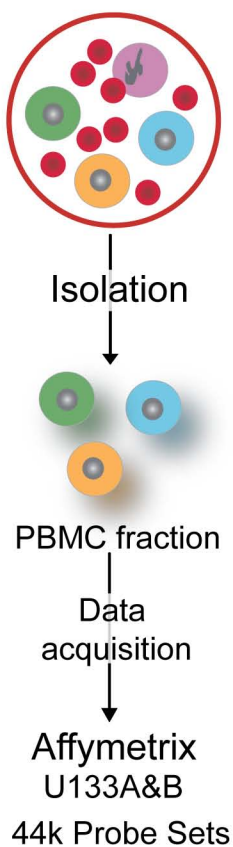

## B) Datasets

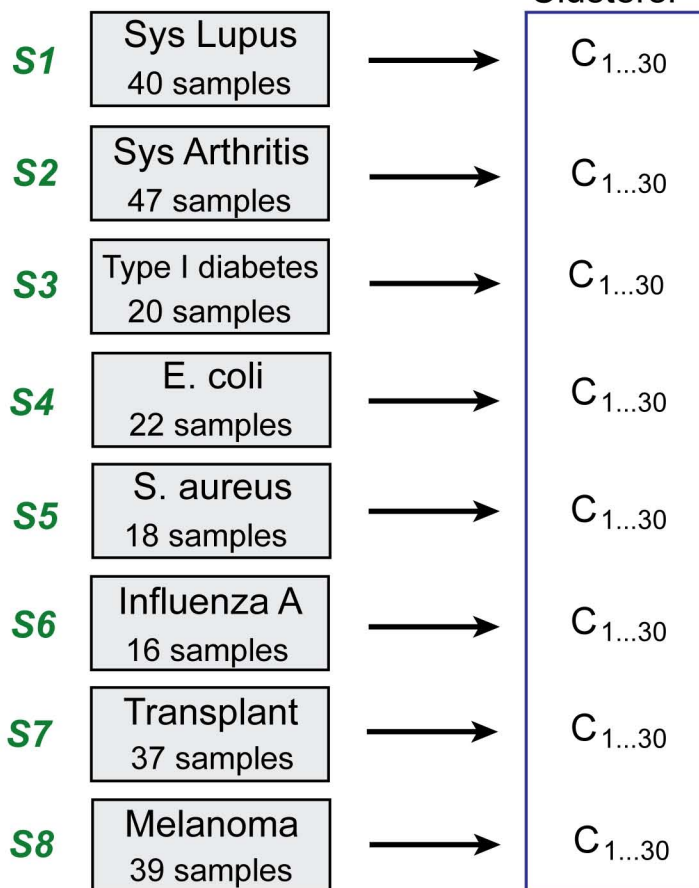

## D) Analysis of cluster membership

|        | <b>S1</b>       | <b>S2</b>       | <b>S3</b>       | <b>S4</b>       | ... |
|--------|-----------------|-----------------|-----------------|-----------------|-----|
| Gene A | C <sub>16</sub> | C <sub>4</sub>  | C <sub>12</sub> | C <sub>20</sub> | ... |
| Gene B | C <sub>8</sub>  | C <sub>29</sub> | C <sub>4</sub>  | C <sub>16</sub> | ... |
| Gene C | C <sub>16</sub> | C <sub>4</sub>  | C <sub>12</sub> | C <sub>20</sub> | ... |
| Gene D | C <sub>2</sub>  | C <sub>10</sub> | C <sub>27</sub> | C <sub>16</sub> | ... |
| ...    | ...             | ...             | ...             | ...             | ... |

## E) Module Selection

Round 1: M1  
Perfect match in 8/8 diseases

Round 2: M2  
Perfect match in 7/8 diseases

Round 3: M3  
Perfect match in 6/8 diseases
