# Supplementary material
Source: PubMed Central journal article supplement (PMC2727981)
Supplement: NIHMS133214-supplement-Supp_Fig_3.pdf [file NIHMS133214-supplement-Supp_Fig_3.pdf]

**SLE(22)**  
**Healthy(11)**

NP Test: Mann Whitney  
 P Value <= 0.05  
 Fold Change: 2.0  
 Current Test: P Only

[show filter controls](#)

**Filter Controls** ✕

Use the slider to change the current p cutoff value:

p:

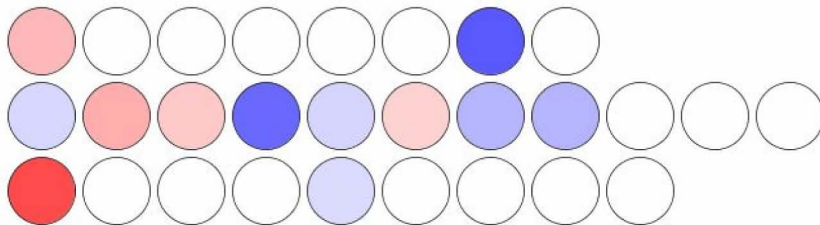

|       | Total | Up | Down | Up Pct | Down Pct |
|-------|-------|----|------|--------|----------|
| M 1.1 | 76    | 27 | 0    | 35.53  | 0.00     |
| M 1.2 | 130   | 9  | 2    | 6.92   | 1.54     |
| M 1.3 | 80    | 1  | 2    | 1.25   | 2.50     |
| M 1.4 | 132   | 5  | 7    | 3.79   | 5.30     |
| M 1.5 | 142   | 21 | 5    | 14.79  | 3.52     |
| M 1.6 | 141   | 1  | 8    | 0.71   | 5.67     |
| M 1.7 | 129   | 0  | 107  | 0.00   | 82.95    |
| M 1.8 | 154   | 5  | 5    | 3.25   | 3.25     |

**SLE(22)**  
**Healthy(11)**

NP Test: Mann Whitney  
 P Value <= 0.05  
 Fold Change: 2.0  
 Current Test: P Only

[show filter controls](#)

**Filter Controls** ✕

Use the slider to change the current p cutoff value:

p:

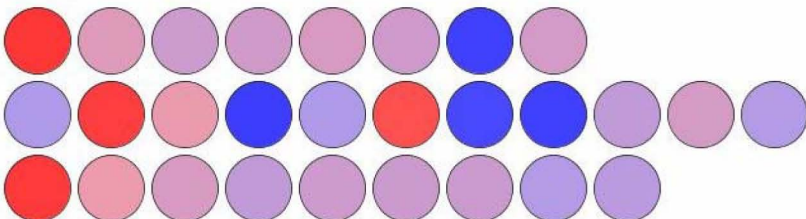

|       | Total | Up | Down | Up Pct | Down Pct |
|-------|-------|----|------|--------|----------|
| M 1.1 | 76    | 76 | 0    | 100.00 | 0.00     |
| M 1.2 | 130   | 89 | 41   | 68.46  | 31.54    |
| M 1.3 | 80    | 39 | 40   | 48.75  | 50.00    |
| M 1.4 | 132   | 71 | 61   | 53.79  | 46.21    |
| M 1.5 | 142   | 86 | 56   | 60.56  | 39.44    |
| M 1.6 | 141   | 72 | 69   | 51.06  | 48.94    |
| M 1.7 | 129   | 6  | 123  | 4.65   | 95.35    |
| M 1.8 | 154   | 86 | 68   | 55.84  | 44.16    |
