# Supplementary material
Source: PubMed Central journal article supplement (PMC2727981)

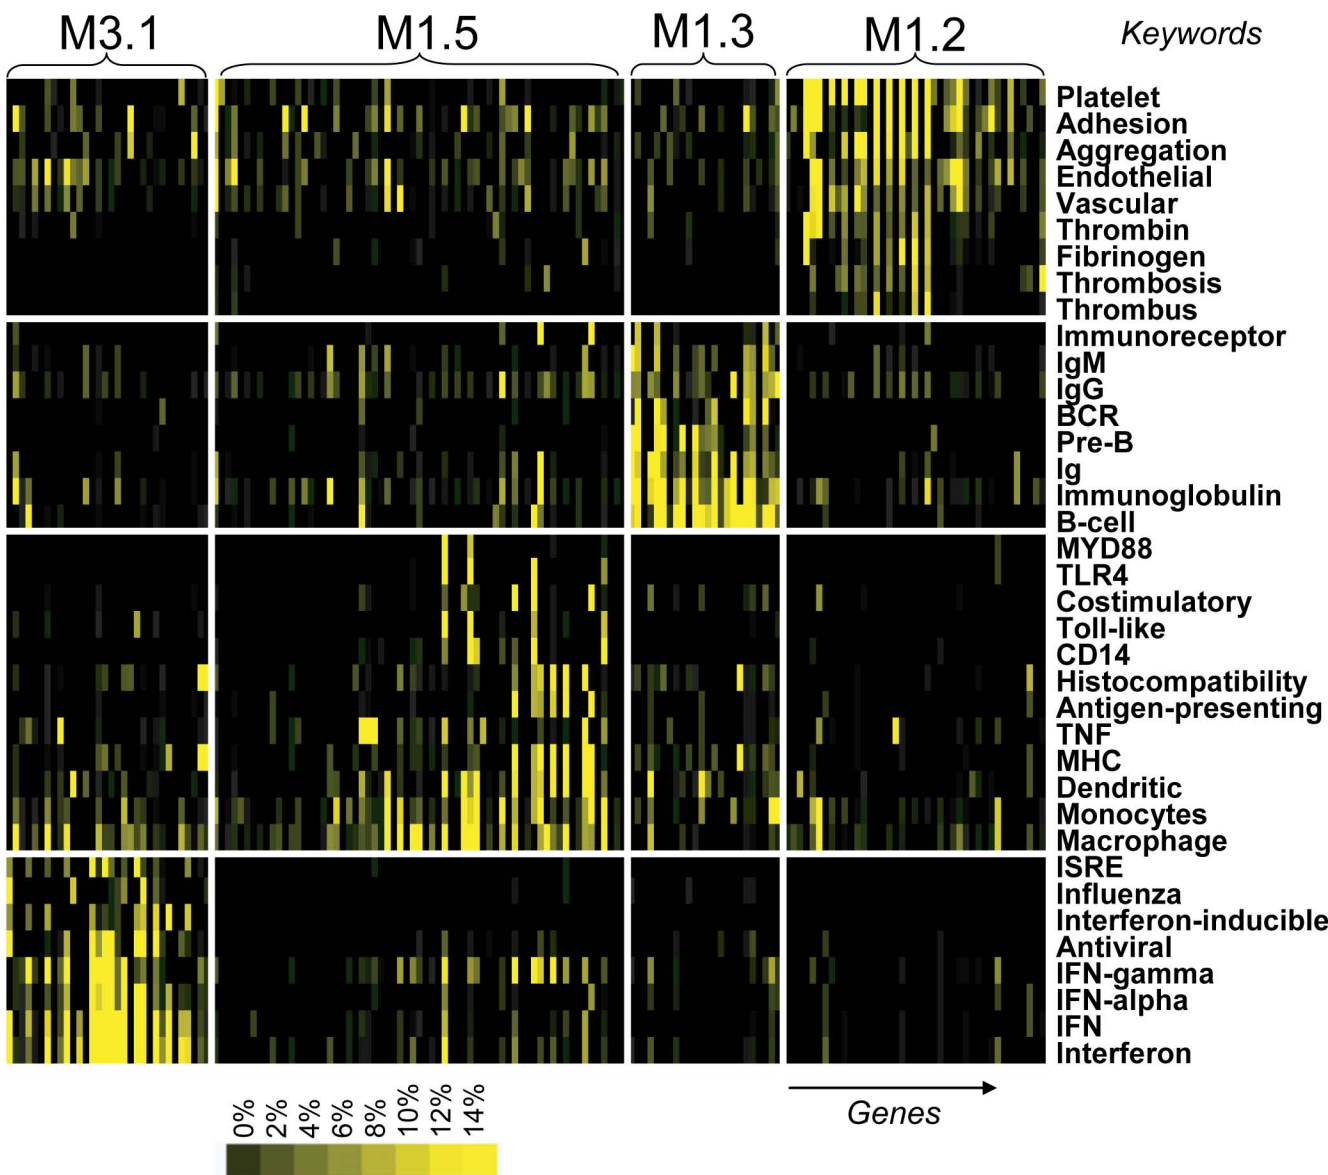

Term Occurrence level in abstracts

Supplement: NIHMS133214-supplement-Supp_Fig_2.pdf [file NIHMS133214-supplement-Supp_Fig_2.pdf]
